# Supplementary material
Source: PubMed Central journal article supplement (PMC3975499)
Supplement: cr201417x1.pdf [file cr201417x1.pdf]

**A**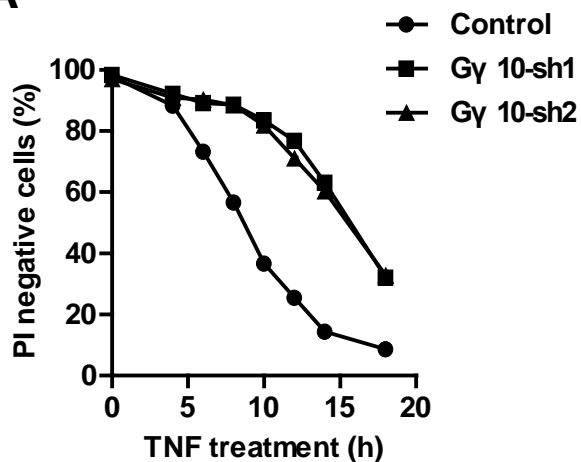**B**

Gy5 (1) -MSGSSSVAAMKKVQQLRLEAGLNRVKVSQAAADLKQFCLONAQHDP LLTGVSSS  
 Gy7 (1) MMSGTNNVAQARKLVEQLRIEAGIERIKVSKASSDLMGYCEQHARNDPLLVGVPAS  
 Gy10 (1) -MSSGASVSA LQRLVEQLKLEAGVERIKVSQAAAELQQYCIQNACKDALLLGVPAG

Gy5 (56) TNPFRPQKVCSFL  
 Gy7 (57) ENPFKDKKPCIIIL  
 Gy10 (56) SNPFREPRSCALL

**C**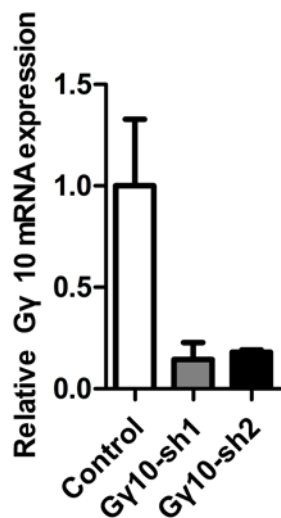**D**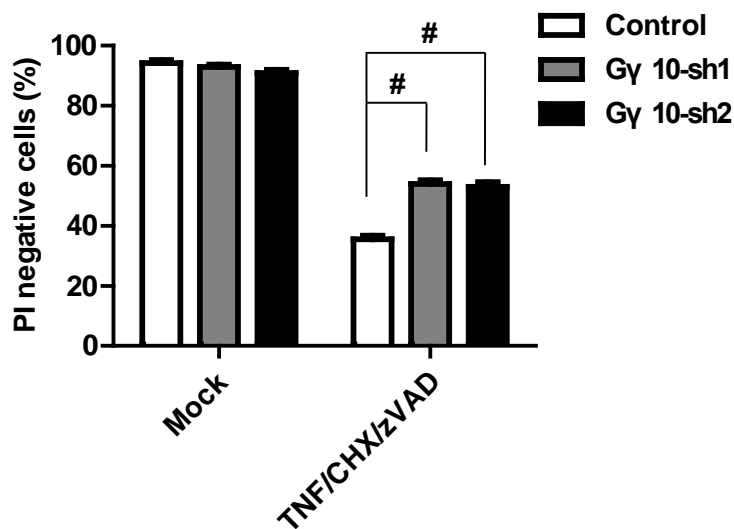

**Supplementary information, Figure S1.** Related to Figure 1. (A) Control and *G $\gamma$ 10* knockdown cells were treated with TNF (10 ng/ml) for different time periods. Cell survival rates were measured. (B) The amino acid sequences of G $\gamma$ 5, G $\gamma$ 7 and G $\gamma$ 10 were aligned using Invitrogen alignX software. Identical amino acids were denoted by black backgrounds and similar amino acids were denoted by grey backgrounds. (C) *G $\gamma$ 10* knockdown efficiency in peritoneal macrophages were determined by qRT-PCR. (D) Control and *G $\gamma$ 10* knockdown MEF cells were treated with TNF (30 ng/ml), CHX (2  $\mu$ g/ml) and zVAD (20  $\mu$ M) for 8 hours. Cell viability were measured. #:  $p < 0.01$ , t test. Data in (A), (C), and (D) depict mean  $\pm$  SEM of one representative experiment of three or more.
