# Supplementary material
Source: PubMed Central journal article supplement (PMC3975499)
Supplement: cr201417x3.pdf [file cr201417x3.pdf]

**A**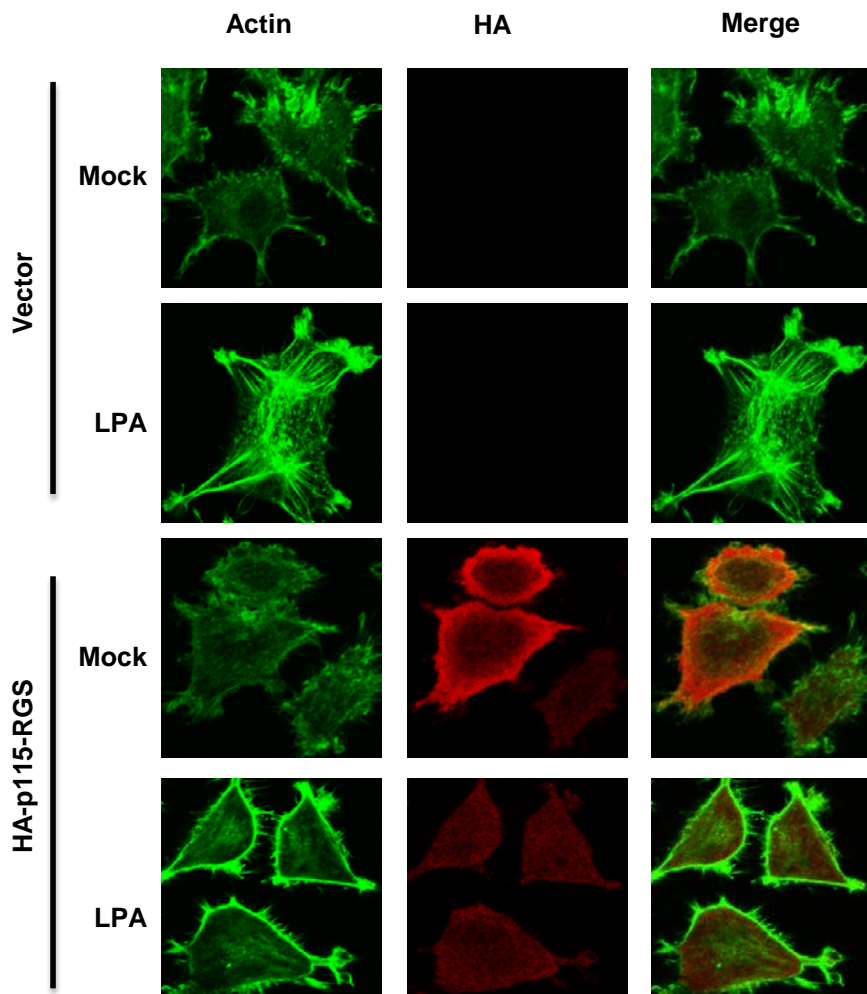**B**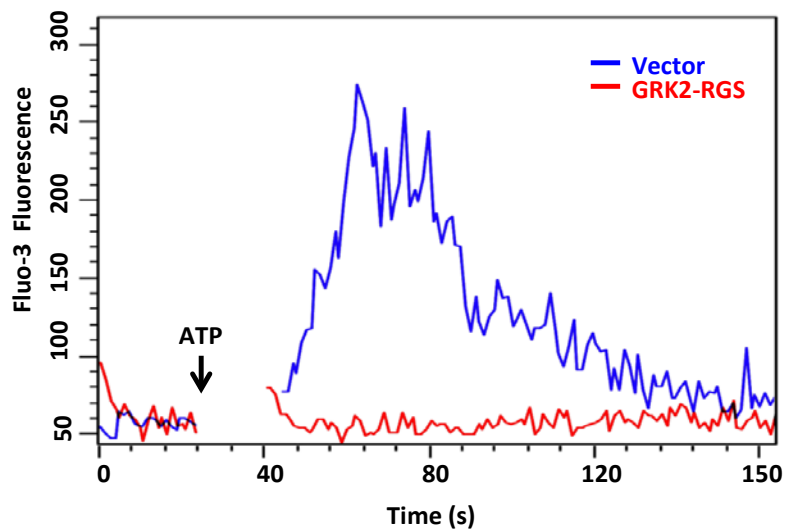

**Supplementary information, Figure S3.** Overexpression p115-RGS domain and GRK2-RGS domain can inhibit  $G\alpha$  dependent signal pathways, related to Figure 4. (A) Cells were infected with lentivirus encoding HA-p115-RGS or vector for 48 hours. Cells were then cultured in serum free medium for 12 hours. Indicated cells were stimulated with or without LPA (10  $\mu$ m) for 45min and then fixed, stained for filamentous actin with Oregon green 514 phalloidin, and immunostained with antibodies for HA epitope tag. (B) Cells were infected lentivirus encoding HA-GRK2-RGS or vector for 48 hours. Then cells were stimulated with ATP (10  $\mu$ m). Calcium mobilizations were measured using Fluo-3 by FACS.
