# Supplementary material
Source: PubMed Central journal article supplement (PMC3975499)
Supplement: cr201417x5.pdf [file cr201417x5.pdf]

**Supplementary information, Figure S5.** Src kinase is involved in necroptosis, related to Figure 6. (A) L929 cells were infected with lentivirus encoding control or *Src* shRNA. After 48 hours, knockdown efficiency of *Src* was determined by Western blot. Control and *Src* knockdown cells were then treated with TNF (10 ng/ml) for 10 hours. Cell viability was measured using PI exclusion. #:  $p < 0.01$ , t test. (B) and (C) Cells were pretreated with Genistein (100  $\mu$ M) for 2 hours or PP2 (2  $\mu$ M) for 6 hours and then were treated with TNF (10 ng/ml) for different time periods. Cell viability was measured. (D) L929 cells were infected with lentivirus expressing *Csk* shRNA or control shRNA. After 48 hours, knockdown efficiency of *Csk* was determined using qRT-PCR. Analyses of these samples are shown in Figure 6C. (E) The same samples shown in Figure 6D were analyzed for Src and Src-Y529F expression. (F) Control or *RIP3* knockout L929 cells were infected with constitutively active mutant Y529F Src for 48 hours. The average numbers of PI positive dots (dead cells) per 1,000 cells were determined and shown. (G) The same samples shown in Figure 6E were analyzed for HA-Src and HA-Src-Y529F expression by Western blot. (H) Peritoneal macrophages were stimulated with LPS alone or LPS plus zVAD. Phosphorylation levels of Src were measured as Figure 6F. Cell viability was measured. Data in (B)-(D), and (F) depict mean  $\pm$  SEM of one representative experiment of three or more.
