# Supplementary material
Source: PubMed Central journal article supplement (PMC3975499)
Supplement: cr201417x6.pdf [file cr201417x6.pdf]

**A**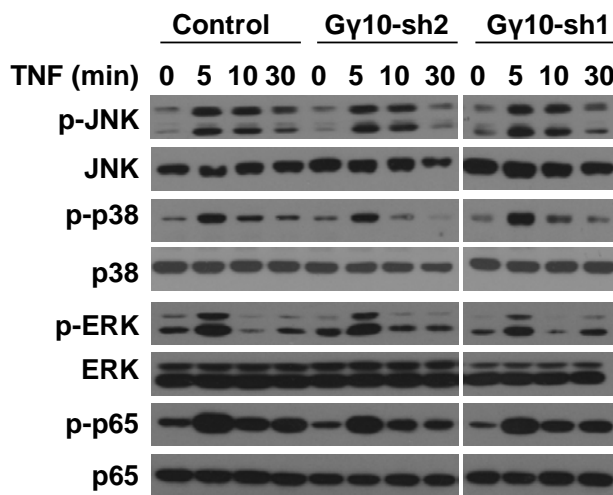**B**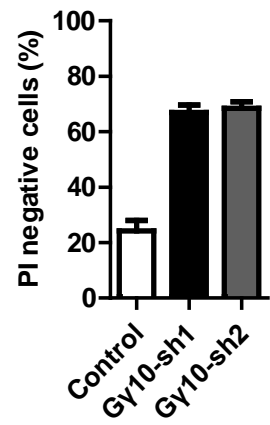**C**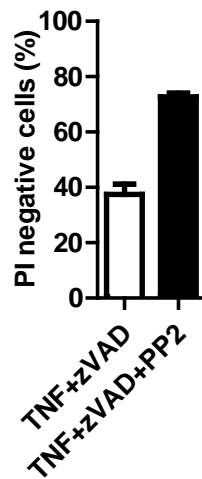**D**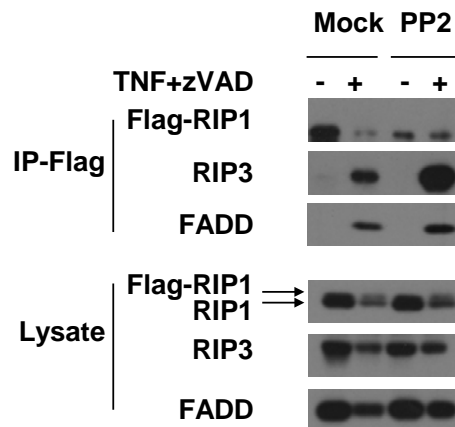**E**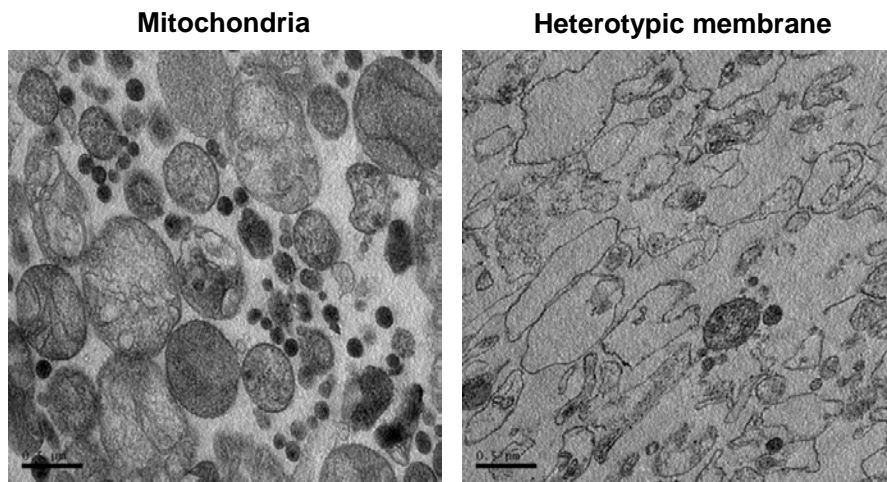

**Supplementary information, Figure S6.** *Gγ10* plays no role in necrosome formation but is required for accumulation of RIP1 and RIP3 in the heterotypic membrane fraction during the process of necroptosis, related to Figure 7. (A) *Gγ10* plays no role in TNF induced NF-κB and MAP kinase activation. Control and *Gγ10* knockdown L929 cells were stimulated with TNF (10 ng/ml) for the indicated time periods. Cells were harvested and whole cell extracts were examined by Western blot to determine phosphorylation and protein levels of indicated proteins. (B) Control and *Gγ10* knockdown L929 cells were challenged with TNF (10 ng/ml) plus zVAD (20 μM) for 3 hours. Cell viability was measured using PI exclusion. (C) L929 cells were pretreated with PP2 (2 μM) for 2 hours and were challenged with TNF (10 ng/ml) plus zVAD (20 μM) for 3 hours. Cell viability was measured using PI exclusion. (D) Src kinase inhibitor does not affect the formation of necrosomes. Flag RIP1 knock-in L929 cells were pretreated with PP2 (2 μM) for 2 hours and were challenged with TNF (10 ng/ml) and zVAD (20 μM) for 3 hours. Immunoprecipitation and immunoblotting were performed as in Figure 7A. (E) Images of mitochondria fraction and heterotypic membrane (HeteroM) fraction by transmission electron microscopy. Data in (B), and (C) depict mean ± SEM of one representative experiment of three or more.
