# Supplementary material
Source: PubMed Central journal article supplement (PMC3975499)
Supplement: cr201417x7.pdf [file cr201417x7.pdf]

**A**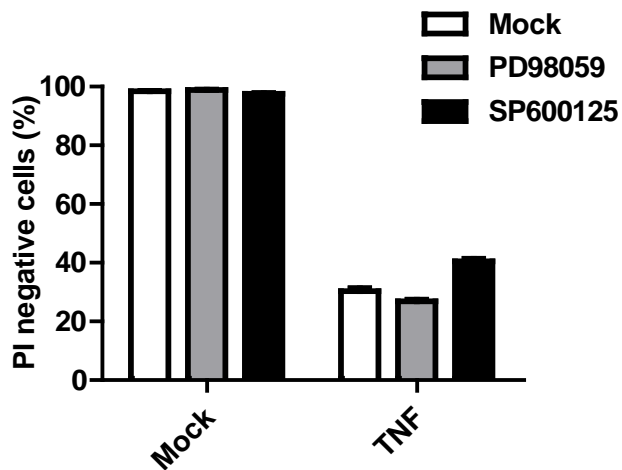**B**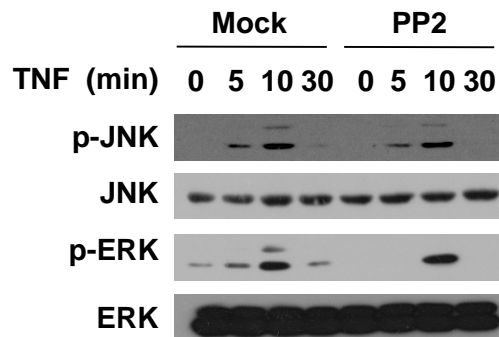

**Supplementary information, Figure S7.** TNF induced ERK and JNK activation does not depend on Src and is not required for TNF induced necroptosis in L929 cells, related to Discussion. (A) Cells were pretreated with ERK inhibitor PD98059 (20  $\mu$ M) or JNK inhibitor SP600125 (10  $\mu$ M) for 2 hours, and then challenged with TNF (10 ng/ml) for 12 hours. Cell viability was measured using PI exclusion. (B) Cells were pretreated with PP2 (2  $\mu$ M) or Mock for 4 hours, and then challenged with TNF (10 ng/ml) for the indicated time periods. The whole cell extracts were examined by Western blot to determine the expression and phosphorylation levels of ERK and JNK. Data in (A) depicts mean  $\pm$  SEM of one representative experiment of three.
