# Supplementary material
Source: PubMed Central journal article supplement (PMC3975499)
Supplement: cr201417x8.pdf [file cr201417x8.pdf]

**A**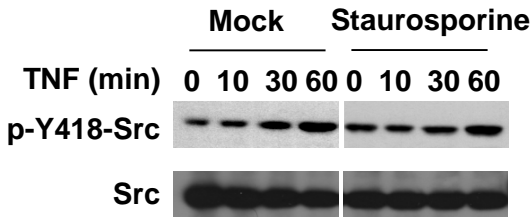**B**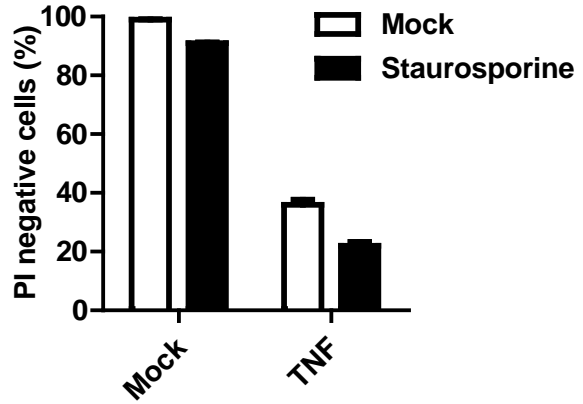

**Supplementary information, Figure S8.** PKC inhibitor has no effect on TNF induced Src kinase activation and necroptosis in L929 cells, related to Discussion. (A) Cells were pretreated with staurosporine (10 nM) overnight and challenged with TNF (10 ng/ml) for indicated times. Then cells were harvested for Western blot with anti-Src and anti-phospho-Tyr418 antibodies. (B) Cells were pretreated with staurosporine (10 nM) overnight and challenged with TNF (10 ng/ml) for 10 hours. Cell viability was measured using PI exclusion. Data in (B) depicts mean  $\pm$  SEM of one representative experiment of three.
