# Supplementary material
Source: PubMed Central journal article supplement (PMC3975499)
Supplement: cr201417x9.pdf [file cr201417x9.pdf]

**Supplementary information, Table S1**

| shRNA names       | shRNA target sequences |
|-------------------|------------------------|
| <i>Gγ10</i> -sh1  | GCTGCTCGGTGTTCCGGCTGG  |
| <i>Gγ10</i> -sh2  | GCGCTGCTCCTTGGCAAATGG  |
| <i>Gγ5</i> -sh1   | CGTCAGTCCTTAACATCTA    |
| <i>Gγ5</i> -sh2   | AGTCATCTATCTTGAGGTT    |
| <i>Gγ7</i> -sh1   | GGAGCAGCTGCGCATTGAAGC  |
| <i>Gγ7</i> -sh2   | GCAACATGCCCCGCAACGATCC |
| <i>Gβ1</i> -sh1   | AATTAGAGATGCTCGTAAA    |
| <i>Gβ1</i> -sh2   | CAGCAGACAACCACATTTA    |
| <i>Gβ1</i> -sh3   | TCTCAGATCACAAACAATA    |
| <i>Gβ2</i> -sh1   | GGTCACAGATGATGGAATG    |
| <i>Gβ2</i> -sh2   | CTGCGTTCCTCCTGGGTCA    |
| <i>Gβ2</i> -sh3   | ACGACGACTTCAACTGCAA    |
| <i>Src</i> -sh1   | TGACAGAGTACATGAACAA    |
| <i>Src</i> -sh2   | GAAACTGAGGCACGAGAAA    |
| <i>Csk</i> -sh1   | CCTGAAGCCTTGAGAGAGA    |
| <i>Csk</i> -sh2   | GTGTGATTGTGGAGGAGAA    |
| <i>Csk</i> -sh3   | TCTACGAGGTGATGAAGAA    |
| <i>TNFR1</i> -sh1 | GGAAGGAGTTCATGCGTTT    |
