# Supplementary material
Source: PubMed Central journal article supplement (PMC3975499)
Supplement: cr201417x10.pdf [file cr201417x10.pdf]

**Supplementary information, Table S2**

| Primer names                        | Primer sequences            |
|-------------------------------------|-----------------------------|
| <i>G<math>\gamma</math>10</i> -RT-F | CTACCAAACCTTGCTGGATGC       |
| <i>G<math>\gamma</math>10</i> -RT-R | TTGGAAATGCAACCTTTCTG        |
| <i>G<math>\gamma</math>5</i> -RT-F  | AGGCAGCTGCAGACTTGAAACAGT    |
| <i>G<math>\gamma</math>5</i> -RT-R  | GGGTCTGAAGGGATTCGTACTIONTGA |
| <i>G<math>\gamma</math>7</i> -RT-F  | TCTCACATCACGACAGCAGA        |
| <i>G<math>\gamma</math>7</i> -RT-R  | GTGAGTCACCTAGGGAGGGA        |
| <i>G<math>\beta</math>1</i> -RT-F   | TTATCTGTCCTGTTGCCGGTTCCT    |
| <i>G<math>\beta</math>1</i> -RT-R   | ACAAACAGTCTGGTGTCAGGAGCA    |
| <i>G<math>\beta</math>2</i> -RT-F   | AGCTCATGACCTACTCCCATGACA    |
| <i>G<math>\beta</math>2</i> -RT-R   | AGACACCTGCTCTGTCAGCTTTGA    |
| <i>G<math>\beta</math>3</i> -RT-F   | CAATAAGGTGCATGCAATCCCGCT    |
| <i>G<math>\beta</math>3</i> -RT-R   | AAGCGGCAACAGGAGAGATAACCT    |
| <i>G<math>\beta</math>4</i> -RT-F   | GTGGGCCGAATACAAATGCGAACA    |
| <i>G<math>\beta</math>4</i> -RT-R   | TCAGAGGGATGGCGTGCATCTTAT    |
| <i>G<math>\beta</math>5</i> -RT-F   | GTGCGTGCAAGCCTTTGAAACTCA    |
| <i>G<math>\beta</math>5</i> -RT-R   | AGGCGCCAAATATGATGCTCTCCT    |
| <i>Csk</i> -RT-F                    | AGCTGAGCATTGATGAGGAGGTGT    |
| <i>Csk</i> -RT-R                    | TTTGGTTTGATGAGGCGAGTGCAG    |

RT: Real-time PCR; F: Forward; R: Reverse
